# Supplementary material for: Warum gibt es immer noch Dekubitus?
Source: Springer Nature journal article supplement (doi:10.1007/s00058-023-3060-9), 2023-04-01

## Abbildungen

### zum Beitrag „Warum gibt es immer noch Dekubitus?“ von Gerhard Schröder

Heilberufe (75) 4/2023, S. 12-14

**Abb. 1** Ein neues Anti-Dekubitussystem, welches Sensorik und Motorik kombiniert: Die Matratze nimmt Bewegungen des Patienten wahr und positioniert den Patienten, wenn dieser sich nicht ausreichend bewegt. Die Bewegungen werden zusätzlich automatisch dokumentiert.

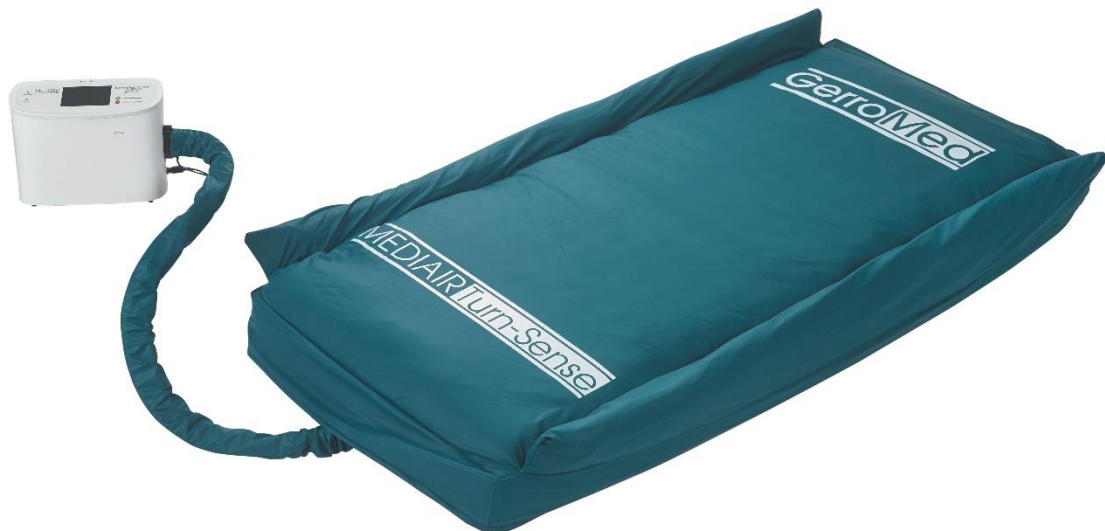

**Abb. 2** SEM-Scanner. Damit kann ein beginnendes Druckgeschwüre bis zu 5 Tage früher als die visuelle Hautbeobachtung im Gewebe festgestellt werden, wenn der Wert  $> 0,7$  ist. Dadurch kann ein Dekubitus noch verhindert werden.

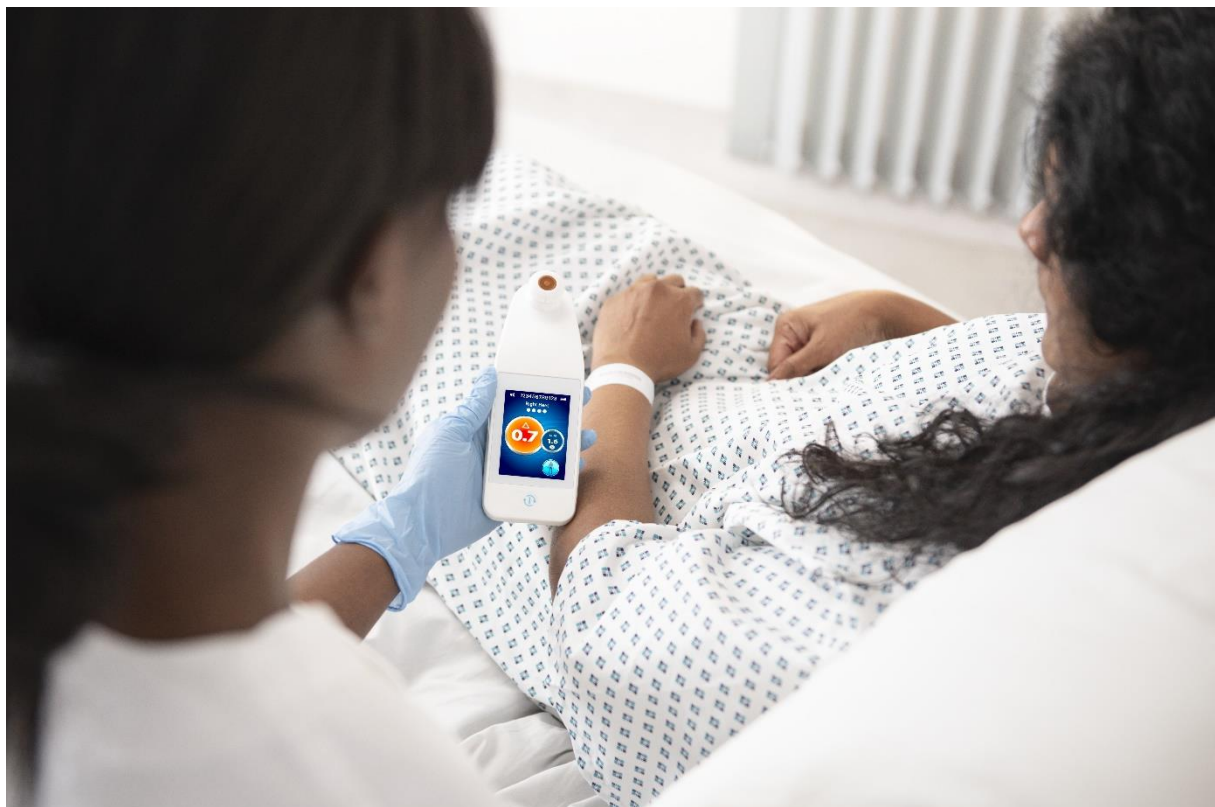

Supplement: MOESM1 [file 25200498]
